# Supplementary material
Source: PubMed Central journal article supplement (PMC5647291)
Supplement: rspb20171081supp1.pdf [file rspb20171081supp1.pdf]

## Supplementary data

### Supplementary Table and Figure Legends

**Table S1.** Primers used for mitochondrial genome amplification and sequencing.

**Table S2.** Descriptive statistics of genetic loci. 'All' refers to analyses including data from all seven considered species; 'Mes' refers to analyses limited to *Mesenchytraeus*.

**Table S3.** Combined-gene datasets and analyses.

**Table S4.** PartitionFinder recommended partitioning schemes used for concatenated datasets; 'pos\_1/2/3' indicates codon position.

**Table S5.** GenBank accession numbers.

**Table S6.** Pairwise percent identity matrices for combined datasets. Lower diagonal is nucleotide data; upper (red) diagonal is amino acid. The housekeeping gene dataset excludes 28S rRNA.

**Table S7.** Bayesian inference gene trees in Newick format.

**Table S8.** Morphological trait comparison of white snow worms to *Mesenchytraeus hydrius*.

**Figure S1.** Scanning electron microscope image of *Mesenchytraeus antaeus*. Ventral surface is up in both images. A. Tongue-like organ projecting from mouth and triangular head pore (HP) B. Segments XXIV-XXVII showing the change in orientation of ectal tips of setae from XXV to XXVI.

**Figure S2.** Morphological features of the white snow worm, *Mesenchytraeus hydrius*. 1. Anterior-dorsal view. 2. Anterior-lateral view. 3. Clitellum: A, dorsal; B, lateral. 4. Spermatheca: A, dorsal; B, lateral. 5. Intestinal region. 6. Penial bulb. 7. Nephridium: A, postclitellar; B, anteclitellar. 8. Sperm funnel. 9. Chaeta. Abbreviations: a, atrium; ag, atrial gland; b, brain; f, female pore; hp, head pore; id, intestinal diverticulum; mco, male copulatory organ; mp, male pore; p, prostomium; pbi, penial bulb invagination; pg, pharyngeal gland; pm, pharyngeal muscles; pp, pharyngeal pad; pr, pristemium; r, rectum; s, spermatheca; sf, sperm funnel; t, testis; vnc, ventral nerve cord.

**Table S1.** Primers used for mitochondrial genome amplification and sequencing. The approximate location of primers within each gene is based on *M. solifugus* sequence.

| Primer    | Approx. location     | Sequence (5' → 3')               | Source |
|-----------|----------------------|----------------------------------|--------|
| Nad1-F1   | 5' end               | GCYATAGCATTTTACACCYWATAG         | 1      |
| Nad1-R1   | 237 bp from 3' end   | AATRTTDGCATATTCWGCTAT            | 1      |
| Nad4-F1   | 588 bp from 5' end   | GGATTTHTAGTAAAACWCCWATATTYTC     | 1      |
| Nad4-R1   | 1110 bp from 5' end  | TTAATDGATGGRGGMGCAGCTAT          | 1      |
| Nad5-F1   | 443 bp from 5' end   | TACTATCARAAYCCWAAATCTYTDGC       | 1      |
| Nad5-R1   | 1044 bp from 5' end  | TKCCCATTCATCGTARRTCTTG           | 1      |
| Nad5-F2   | 530 bp from 5' end   | GCHTGAACYTTAAAYCARGGKCA          | 1      |
| Nad5-R2   | 1072 bp from 5' end  | TGWDGCTACTGGYATTTG               | 1      |
| Cox2-F1   | 5' end of COII       | TGAGGWCAAYTAAYATTYCAAGACG        | 1      |
| Cox2-R1   | Middle of COII       | TAYTCRTATCTTCARTATCATTG          | 1      |
| Cox2-F2   | Middle of COII       | CAATGATAYTGAAGATAYGARTA          | 1      |
| 16S-F1    | Middle of 16S        | GTATCCTAACCGTGCAAAGG             | 1      |
| 16S-R1    | 3' end of 16S        | CTTACGCCGGTCTGAACTCAG            | 1      |
| 16S-R2    | Middle of 16S        | TACCTTTCACGGTTAGGATAC            | 1      |
| Cox3-F1   | Middle of COIII      | AGNGTDACHGTWACMTGAGC             | 1      |
| Cox3-R1   | 3' end of COIII      | ACRTCWACAAARTGTCARTATC           | 1      |
| Cox3-F2   | 170 bp 3' of Cox3-F1 | TTGTAGCHACWGGWTTCCAYGG           | 1      |
| Cox3-R2   | 170 bp 3' of Cox3-F1 | CCRTGGAAWCCWGTGCTACAAA           | 1      |
| Nad6-F1   | 178 bp from 5' end   | GGYATATTAGTAATATTTKCWTAYTTYGT    | 1      |
| Nad6-R2   | 178 bp from 5' end   | GCYACRAARTAWGMAAATATTACTAATATRCC | 1      |
| Nad2-F1   | 163 bp from 5' end   | GAAGCAKCARTTAARTAYTTMTTA         | 1      |
| Nad2-R1   | Middle of Nad2       | CATCCTATRTGRGTAATWGATG           | 1      |
| Nad2-F2   | 150 bp 3' of Nad2-F1 | GGWATRGCHCCMTGYCAYTATG           | 1      |
| Nad2-R2   | 150 bp 3' of Nad2-F1 | CATARRTGRCAKGGDGCYATWCC          | 1      |
| Nad3-F1   | 112 bp from 5' end   | CCATTTGARTGTGGATTYGAYCC          | 1      |
| Nad3-R1   | 3' end               | CADTYAATGANCCYTWATTTTCATTC       | 1      |
| CytB-F1   | 370 bp from 5' end   | ACHATRGCHACAGCATTATAGG           | 1      |
| CytB-R1   | 3' end               | TCTTCTACTGGBCGSCCHCAATTC         | 1      |
| CytB-F2   | 120 bp 3' of CytB-F1 | AATWTGAGGHGGNTTTGCHGTAG          | 1      |
| CytB-R2   | 120 bp 3' of CytB-F1 | CTACDGCAAANCCDCCTCASATTC         | 1      |
| CytB-F3   | 307 bp from 3' end   | GAGTDTATGCWATTYTAGATCWATTCC      | 1      |
| CytB-R3   | 307 bp from 3' end   | GGAATSGATCGTARAATSGCATAHACTC     | 1      |
| Atp6-F496 | 496 bp from 5' end   | GCWAAYATAAGAGCNGGBCAYATYGT       | 1      |
| Atp-R521  | 496 bp from 5' end   | ACRATRTGVCCNGCTCTTATRTTSGC       | 1      |
| 12S-A1    | 5' end               | AAACTAGGATTAGATACCCTATTAT        | 2      |
| 12S-R1    | 3' end               | GAGAGYGACGGCGATGTGT              | 1      |
| LCO1490   | 5' end of COI        | GGTCAACAAATCATAAAGATATTGG        | 3      |
| HCO2198   | Middle of COI        | TAAACTTCAGGGTGACCAAAAATCA        | 3      |
| COI_r     | 3' end of COI        | CCDCTTAGWCCTARRAARTGTTGNGG       | 1      |
| Cox5.1    | Middle of COI        | GATTCTTTGGACATCCAGAAG            | 4      |
| IW-LCO    | 5' end of COI        | ACTCAACTAATCACAAGACATTG          | 1      |
| IW-HCO    | Middle of COI        | ACTTCTGGATGTCCAAGAATC            | 1      |

Primer sources: 1 = this study; 2 = Borda and Siddall, 2004; 3 = Folmer, *et al.*, 1994; 4 = Hartzell, *et al.*, 2005.

**Table S2.**

| Gene Category                             | Gene             | Alignment positions | Conserved |      | Variable |     | Parsimony informative |      | Parsimony informative |      |
|-------------------------------------------|------------------|---------------------|-----------|------|----------|-----|-----------------------|------|-----------------------|------|
|                                           |                  |                     | All       | Mes  | All      | Mes | All                   | %    | Mes                   | %    |
| Nuclear-encoded housekeeping genes        | <i>actin</i>     | 1131                | 878       | 911  | 253      | 220 | 157                   | 13.9 | 94                    | 8.3  |
|                                           | <i>α-tubulin</i> | 1353                | 1026      | 1080 | 327      | 273 | 207                   | 15.3 | 95                    | 7.0  |
|                                           | <i>EF-1α</i>     | 1398                | 1041      | 1155 | 357      | 243 | 216                   | 15.5 | 77                    | 5.5  |
|                                           | <i>histone3</i>  | 408                 | 267       | 305  | 141      | 103 | 80                    | 19.6 | 47                    | 11.5 |
|                                           | <i>GAPDH</i>     | 1011                | 689       | 770  | 322      | 241 | 226                   | 22.4 | 87                    | 8.6  |
|                                           | <i>28S rRNA</i>  | 600                 | 441       | 542  | 159      | 57  | 128                   | 21.3 | 13                    | 2.2  |
| Nuclear-encoded ATP synthase subunits     | <i>alpha</i>     | 1656                | 1133      | 1284 | 523      | 372 | 389                   | 23.5 | 116                   | 7.0  |
|                                           | <i>beta</i>      | 1311                | 958       | 1019 | 353      | 292 | 229                   | 17.5 | 105                   | 8.0  |
|                                           | <i>gamma</i>     | 840                 | 417       | 599  | 423      | 241 | 198                   | 23.6 | 83                    | 9.9  |
|                                           | <i>delta</i>     | 525                 | 319       | 357  | 206      | 153 | 159                   | 30.3 | 61                    | 11.6 |
|                                           | <i>epsilon</i>   | 201                 | 113       | 140  | 88       | 61  | 33                    | 16.4 | 13                    | 6.5  |
|                                           | <i>b</i>         | 927                 | 463       | 614  | 461      | 307 | 355                   | 38.3 | 110                   | 11.9 |
|                                           | <i>c</i>         | 486                 | 296       | 350  | 187      | 124 | 152                   | 31.3 | 41                    | 8.4  |
|                                           | <i>d</i>         | 516                 | 267       | 360  | 249      | 156 | 199                   | 38.6 | 52                    | 10.1 |
|                                           | <i>OSCP</i>      | 633                 | 366       | 438  | 267      | 195 | 206                   | 32.5 | 72                    | 11.4 |
| Mitochondrial protein-coding OXPHOS genes | <i>cox1</i>      | 1536                | 1008      | 1079 | 528      | 457 | 344                   | 22.4 | 199                   | 13.0 |
|                                           | <i>Cox2</i>      | 678                 | 414       | 460  | 264      | 218 | 183                   | 27.0 | 95                    | 14.0 |
|                                           | <i>Cox3</i>      | 777                 | 472       | 513  | 305      | 264 | 222                   | 28.6 | 125                   | 16.1 |
|                                           | <i>Cytb</i>      | 1137                | 677       | 754  | 460      | 383 | 323                   | 28.4 | 170                   | 15.0 |
|                                           | <i>Nad1</i>      | 936                 | 503       | 596  | 433      | 340 | 316                   | 33.8 | 153                   | 16.3 |
|                                           | <i>Nad2</i>      | 1005                | 419       | 532  | 586      | 470 | 440                   | 43.8 | 200                   | 19.9 |
|                                           | <i>Nad3</i>      | 354                 | 171       | 203  | 183      | 148 | 125                   | 35.3 | 46                    | 13.0 |
|                                           | <i>Nad4</i>      | 1359                | 612       | 777  | 747      | 579 | 534                   | 39.3 | 226                   | 16.6 |
|                                           | <i>Nad4L</i>     | 297                 | 141       | 183  | 156      | 111 | 118                   | 39.7 | 52                    | 17.5 |
|                                           | <i>Nad5</i>      | 1746                | 800       | 977  | 946      | 769 | 698                   | 40.0 | 334                   | 19.1 |
|                                           | <i>Nad6</i>      | 474                 | 197       | 248  | 277      | 220 | 223                   | 47.0 | 100                   | 21.1 |
|                                           | <i>Atp6</i>      | 699                 | 341       | 450  | 358      | 249 | 284                   | 40.6 | 113                   | 16.2 |
|                                           | <i>Atp8</i>      | 165                 | 78        | 92   | 87       | 67  | 69                    | 41.8 | 32                    | 19.4 |
| Mitochondrial RNA genes                   | <i>12s</i>       | 802                 | 508       | 587  | 294      | 195 | 198                   | 24.7 | 61                    | 7.6  |
|                                           | <i>16s</i>       | 1164                | 744       | 898  | 420      | 266 | 287                   | 24.7 | 79                    | 6.8  |

**Table S3.**

| Dataset   | Genes                                                                                                     | Size (bp) | Analysis                 | Framework |
|-----------|-----------------------------------------------------------------------------------------------------------|-----------|--------------------------|-----------|
| HK6       | actin, $\alpha$ -tubulin, EF-1 $\alpha$ , GAPDH, histone H3, 28S rRNA                                     | 5,916     | Phylogenetic inference   | ML/BI     |
| Mt4       | cox1, cytb, 12S rRNA, 16S rRNA                                                                            | 4,600     | Phylogenetic inference   | ML/BI     |
| MtPCGs    | cox1-3, cytb, nad1-6 + 4L, atp6, atp8                                                                     | 11,107    | Phylogenetic inference   | ML/BI     |
| Mt13+RNAs | cox1-3, cytb, nad1-6 + 4L, atp6, atp8, 12S, tRNA-V, 16S                                                   | 13,381    | Phylogenetic inference   | ML/BI     |
| nuASU     | alpha, beta, gamma, delta, b, c, d, OSCP                                                                  | 6,894     | Phylogenetic inference   | ML/BI     |
| Coal_set1 | cox1-3, cytb, nad1-6, alpha, beta, b, actin, $\alpha$ -tubulin, EF-1 $\alpha$ , GAPDH, 28S                | 18,429    | Multi-species coalescent | BI        |
| Coal_set2 | cytb, nad2/4/5, 12S, alpha, gamma, b, c, delta, actin, EF-1 $\alpha$ , $\alpha$ -tubulin, histone H3, 28S | 14,232    | Multi-species coalescent | BI        |
| Diverge   | cox1, cytb, nad4, actin, EF-1 $\alpha$ , histone H3, 28S                                                  | 7,478     | Divergence dating        | BI        |

**Table S4.**

PartitionFinder recommended partitioning schemes used for concatenated datasets.

| Dataset   | Genes                                                   | No. of partitions | Partition scheme                                                                                                                                                                                                                                                                                                                                                      |
|-----------|---------------------------------------------------------|-------------------|-----------------------------------------------------------------------------------------------------------------------------------------------------------------------------------------------------------------------------------------------------------------------------------------------------------------------------------------------------------------------|
| HK6       | Actin, a-tubulin, EF1a, GAPDH, Histone3, 28S rRNA       | 5                 | (EF1a_pos1, H3_pos1, aTub_pos1, actin_pos1, GAPDH_pos1) (EF1a_pos2, H3_pos2, aTub_pos2, actin_pos2, GAPDH_pos2) (EF1a_pos3, aTub_pos3, actin_pos3) (H3_pos3, GAPDH_pos3) (28S)                                                                                                                                                                                        |
| Mt4       | COI, Cytb, 12S rRNA, 16S rRNA                           | 5                 | (Cytb_pos1, COI_pos1) (COI_pos2) (Cytb_pos3, COI_pos3) (Cytb_pos2) (rRNAs)                                                                                                                                                                                                                                                                                            |
| MtPCGs    | Cox1-3, Cytb, Nad1-6 + 4L, Atp6, Atp8                   | 6                 | (COI_p1, Cox2_p1, Cox3_p1, CytB_p1) (COI_p2) (Atp6_p3, Atp8_p3, COI_p3, Cox2_p3, Cox3_p3, CytB_p3, Nad1_p3, Nad2_p3, Nad3_p3, Nad4L_p3, Nad4_p3, Nad5_p3, Nad6_p3) (Cox2_p2, Cox3_p2, CytB_p2, Nad1_p2, Nad4L_p2) (Atp6_p1, Atp8_p1, Nad1_p1, Nad2_p1, Nad3_p1, Nad4L_p1, Nad4_p1, Nad5_p1, Nad6_p1) (Atp6_p2, Atp8_p2, Nad2_p2, Nad3_p2, Nad4_p2, Nad5_p2, Nad6_p2); |
| Mt13+RNAs | Cox1-3, Cytb, Nad1-6 + 4L, Atp6, Atp8, 12S, tRNA-V, 16S | 7                 | Same as above, plus one additional partition for the RNAs                                                                                                                                                                                                                                                                                                             |
| nuASU     | Alpha, Beta, Gamma, Delta, b, c, d, OSCP                | 7                 | (alpha_pos1, beta_pos1) (alpha_pos2, beta_pos2) (alpha_pos3, delta_pos3, oscp_pos3, syn-b_pos3, syn-c_pos3, syn-d_pos3) (delta_pos1, gamma_pos1, oscp_pos1, syn-b_pos1, syn-c_pos1, syn-d_pos1) (gamma_pos2, oscp_pos2, syn-b_pos2, syn-d_pos2) (beta_pos3, gamma_pos3) (delta_pos2, syn-c_pos2)                                                                      |

**Table S5.**  
GenBank accession numbers.

| Gene Category                                | Gene             | <i>E. albidus</i> | <i>E. crypticus</i> | <i>M. solifugus</i> | <i>M. pedatus</i> | <i>M. antaeus</i> | <i>M. gelidus</i> | <i>M. hydrius</i> |
|----------------------------------------------|------------------|-------------------|---------------------|---------------------|-------------------|-------------------|-------------------|-------------------|
| <b>Nuclear-encoded housekeeping genes</b>    | <i>actin</i>     | KU728801          | KU728802            | KU728803            | KU728804          | KU728805          | KU728806          | KU728807          |
|                                              | <i>α-tubulin</i> | KU728808          | KU728809            | KU728810            | KU728811          | KU728812          | KU728813          | KU728814          |
|                                              | <i>EF-1α</i>     | KU728815          | KU728816            | KU728817            | KU728818          | KU728819          | KU728820          | KU728821          |
|                                              | <i>histone3</i>  | KU728829          | KU728830            | KU728831            | KU728832          | KU728833          | KU728834          | KU728835          |
|                                              | <i>GAPDH</i>     | KU728822          | KU728823            | KU728824            | KU728825          | KU728826          | KU728827          | KU728828          |
| <i>28s rRNA</i>                              |                  |                   |                     |                     |                   |                   |                   |                   |
| <b>Nuclear-encoded ATP synthase subunits</b> | <i>alpha</i>     | KU728752          | KU728753            | KU728754            | KU728755          | KU728756          | KU728757          | KU728758          |
|                                              | <i>beta</i>      | KU728766          | KU728767            | KU728768            | KU728769          | KU728770          | KU728771          | KU728772          |
|                                              | <i>gamma</i>     | No Data           | KU728788            | KU728789            | KU728790          | KU728791          | KU728792          | KU728793          |
|                                              | <i>delta</i>     | KU728780          | KU728781            | KU728782            | KU728783          | KU728784          | KU728785          | KU728786          |
|                                              | <i>epsilon</i>   |                   |                     |                     |                   |                   |                   |                   |
|                                              | <i>b</i>         | KU728759          | KU728760            | KU728761            | KU728762          | KU728763          | KU728764          | KU728765          |
|                                              | <i>c</i>         | KU728745          | KU728746            | KU728747            | KU728748          | KU728749          | KU728750          | KU728751          |
|                                              | <i>d</i>         | KU728773          | KU728774            | KU728775            | KU728776          | KU728777          | KU728778          | KU728779          |
| <i>OSCP</i>                                  | KU728794         | KU728795          | KU728796            | KU728797            | KU728798          | KU728799          | KU728800          |                   |
| <b>Mitochondrial protein-coding genes</b>    | <i>COI</i>       | KU728850          | KU728851            | KU728852            | KU728853          | KU728854          | KU728855          | KU728856          |
|                                              | <i>Cox2</i>      | KU728857          | KU728858            | KU728859            | KU728860          | KU728861          | KU728862          | KU728863          |
|                                              | <i>Cox3</i>      | KU728864          | KU728865            | KU728866            | KU728867          | KU728868          | KU728869          | KU728870          |
|                                              | <i>Cytb</i>      | KU728843          | KU728844            | KU728845            | KU728846          | KU728847          | KU728848          | KU728849          |
|                                              | <i>Nad1</i>      | KU728871          | KU728872            | KU728873            | KU728874          | KU728875          | KU728876          | KU728877          |
|                                              | <i>Nad2</i>      | KU728878          | KU728879            | KU728880            | KU728881          | KU728882          | KU728883          | KU728884          |
|                                              | <i>Nad3</i>      | KU728885          | KU728886            | KU728887            | KU728888          | KU728889          | KU728890          | KU728891          |
|                                              | <i>Nad4</i>      | KU728892          | KU728893            | KU728894            | KU728895          | KU728896          | KU728897          | KU728898          |
|                                              | <i>Nad4L</i>     | KU728899          | KU728900            | KU728901            | KU728902          | KU728903          | KU728904          | KU728905          |
|                                              | <i>Nad5</i>      | KU728906          | KU728907            | KU728908            | KU728909          | KU728910          | KU728911          | KU728912          |
|                                              | <i>Nad6</i>      | KU728913          | KU728914            | KU728915            | KU728916          | KU728917          | KU728918          | KU728919          |
|                                              | <i>Atp6</i>      | KU728836          | KU728837            | KU728838            | KU728839          | KU728840          | KU728841          | KU728842          |
| <i>Atp8</i>                                  | KU639961         | KU639962          | KU639963            | KU639964            | KU639965          | KU639966          | KU639967          |                   |
| <b>Mitochondrial rRNA genes</b>              | <i>12s</i>       | KU728920          | KU728921            | KU728922            | KU728923          | KU728924          | KU728925          | KU728926          |
|                                              | <i>16s</i>       | KU728927          | KU728928            | KU728929            | KU728930          | KU728931          | KU728932          | KU728933          |

**Table S6.**

Pairwise percent identity matrices for combined datasets. Lower diagonal is nucleotide data; upper (red) diagonal is amino acid. The housekeeping gene dataset excludes 28S rRNA.

| Dataset                                         | <i>E. albidus</i>   | <i>E. crypticus</i> | <i>M. pedatus</i> | <i>M. solifugus</i> | <i>M. antaeus</i> | <i>M. gelidus</i> | <i>M. hydrius</i> |       |
|-------------------------------------------------|---------------------|---------------------|-------------------|---------------------|-------------------|-------------------|-------------------|-------|
| 5 nuclear house-keeping genes<br>5304 bp        | <i>E. albidus</i>   |                     | 98.64             | 94.84               | 94.61             | 94.72             | 95.18             | 94.90 |
|                                                 | <i>E. crypticus</i> | 93.1                |                   | 94.72               | 94.67             | 94.72             | 95.01             | 95.12 |
|                                                 | <i>M. pedatus</i>   | 82.3                | 82.6              |                     | 96.49             | 96.88             | 97.17             | 96.43 |
|                                                 | <i>M. solifugus</i> | 82.1                | 82.6              | 86.7                |                   | 97.62             | 98.47             | 97.17 |
|                                                 | <i>M. antaeus</i>   | 84.0                | 84.7              | 85.1                | 86.0              |                   | 98.13             | 96.77 |
|                                                 | <i>M. gelidus</i>   | 83.9                | 84.5              | 85.3                | 86.9              | 90.0              |                   | 97.28 |
|                                                 | <i>M. hydrius</i>   | 84.5                | 84.8              | 85.9                | 86.4              | 89.5              | 90.0              |       |
| 8 nuclear ATP synthase subunits<br>6894 bp      | <i>E. albidus</i>   |                     | 93.7              | 78.03               | 77.2              | 77.72             | 77.76             | 77.58 |
|                                                 | <i>E. crypticus</i> | 92.7                |                   | 80.49               | 79.31             | 79.78             | 80                | 79.68 |
|                                                 | <i>M. pedatus</i>   | 70.6                | 72.1              |                     | 91.58             | 94.31             | 93.83             | 92.64 |
|                                                 | <i>M. solifugus</i> | 69.9                | 70.9              | 82.5                |                   | 92.15             | 91.49             | 92.71 |
|                                                 | <i>M. antaeus</i>   | 70.0                | 71.3              | 86.9                | 83.4              |                   | 95.89             | 92.99 |
|                                                 | <i>M. gelidus</i>   | 70.7                | 71.7              | 86.6                | 83.4              | 89.1              |                   | 92.64 |
|                                                 | <i>M. hydrius</i>   | 70.4                | 71.6              | 83.9                | 84.0              | 85.8              | 85.8              |       |
| 13 mitochondrial PCGs<br>11,160 bp              | <i>E. albidus</i>   |                     | 96.75             | 69.22               | 69.43             | 69.97             | 70.15             | 70.29 |
|                                                 | <i>E. crypticus</i> | 88.4                |                   | 69.43               | 69.61             | 70.21             | 70.14             | 70.28 |
|                                                 | <i>M. pedatus</i>   | 69.4                | 69.2              |                     | 84.27             | 86.54             | 87.39             | 85.16 |
|                                                 | <i>M. solifugus</i> | 68.3                | 67.9              | 75.9                |                   | 85.5              | 86.37             | 88.29 |
|                                                 | <i>M. antaeus</i>   | 70.0                | 69.5              | 78.4                | 76.9              |                   | 89.58             | 86.95 |
|                                                 | <i>M. gelidus</i>   | 66.8                | 66.6              | 75.7                | 74.1              | 77.0              |                   | 87.77 |
|                                                 | <i>M. hydrius</i>   | 69.5                | 69.2              | 77.6                | 78.1              | 79.2              | 75.8              |       |
| Mitochondrial COI-CytB 12s-16s rRNAs<br>4600 bp | <i>E. albidus</i>   |                     |                   |                     |                   |                   |                   |       |
|                                                 | <i>E. crypticus</i> | 91.7                |                   |                     |                   |                   |                   |       |
|                                                 | <i>M. pedatus</i>   | 75.2                | 74.9              |                     |                   |                   |                   |       |
|                                                 | <i>M. solifugus</i> | 75.3                | 75.0              | 81.9                |                   |                   |                   |       |
|                                                 | <i>M. antaeus</i>   | 75.1                | 74.6              | 83.1                | 83.5              |                   |                   |       |
|                                                 | <i>M. gelidus</i>   | 74.3                | 74.5              | 83.4                | 83.7              | 85.7              |                   |       |
|                                                 | <i>M. hydrius</i>   | 73.9                | 73.9              | 82.9                | 84.3              | 84.8              | 85.0              |       |

Table S7.

| LocI    | Bayesian Inference Newick Trees                                                                                                                            |
|---------|------------------------------------------------------------------------------------------------------------------------------------------------------------|
| 12s     | (Ealb:0.006770898,Ecry:0.03538963,(Mped:0.1356714,(Msol:0.09907861,Mhyd:0.08418686):0.03167925,(Mant:0.07932975,MgeI:0.09419123):0.02030384):0.7611206);   |
| 16s     | (Ealb:0.006770898,Ecry:0.03538963,(Mped:0.1356714,(Msol:0.09907861,Mhyd:0.08418686):0.03167925,(Mant:0.07932975,MgeI:0.09419123):0.02030384):0.7611206);   |
| 28s     | (Ealb:0.009272668,Ecry:0.003186291,(Mped:0.01092156,(Msol:0.02990588,Mhyd:0.03602543):0.007846756,(Mant:0.01396765):0.008108208):0.007772201,MgeI:0.011    |
| Actin   | (Ealb:0.006634816,Ecry:0.01077796,(Mped:0.02552142,(Msol:0.06971496,MgeI:0.04039868):0.03221018,(Mant:0.1219178):0.05155338,Mhyd:0.02191136):0.01205492    |
| Alpha   | (Ealb:0.008025507,Ecry:0.03388649,(Mped:0.08920178,(Mant:0.04654193):0.007337236,MgeI:0.05208632):0.04008744,(Msol:0.08265423):0.02041718,Mhyd:0.074234    |
| Atp6    | (Ealb:0.1006109,Ecry:0.06697589,(Mped:0.5359191,(Msol:0.2669599,Mhyd:0.1365852):0.07045715,MgeI:0.1374161):0.1030408,(Mant:0.03734736):1.667381);          |
| Atp8    | (Ealb:0.04558744,Ecry:0.05204976,(Mped:0.08935008,(Msol:0.2350216,Mhyd:0.06556376):0.2291701,(Mant:0.04224696):0.05427059,MgeI:0.1921267):0.1337614):0.7   |
| aTub    | (Ealb:0.0280425,Ecry:0.05940868,(Mped:0.1844469,(Mant:0.047322):0.0229864,(Msol:0.05237005,MgeI:0.06000996):0.01533611,Mhyd:0.05423477):0.02439432):0.10   |
| Beta    | (Ealb:0.009431517,Ecry:0.01898405,(Mped:0.09013813,(Msol:0.1703738):0.04445966,MgeI:0.04070362):0.0203751,(Mant:0.06328075,Mhyd:0.08784072):0.0186773);    |
| COI     | (Ealb:0.04967886,Ecry:0.08279515,(Mped:0.1265964,(Msol:0.1823573,(Mant:0.10222228,(MgeI:0.1406486,Mhyd:0.1248605):0.02142548):0.0308885):0.01767774):0.166 |
| Cox2    | (Ealb:0.05148498,Ecry:0.07268306,(Mped:0.2101649,(Msol:0.2368364,Mhyd:0.07374255):0.07473834,(Mant:0.1347546):0.04838382,MgeI:0.1468044):0.4432648);       |
| Cox3    | (Ealb:0.1100225,Ecry:0.08157745,(Mped:0.1309824,(Msol:0.3234226,(Mant:0.2194696,Mhyd:0.2078351):0.04899946,MgeI:0.1683284):0.06326157):0.3822504);         |
| Cytb    | (Ealb:0.1899507,Ecry:0.1136645,(Mped:0.2216164,(Msol:0.2761503,Mhyd:0.2795215):0.08509904,(Mant:0.2359159):0.06556462,MgeI:0.2144372):0.1312525):0.74179   |
| Delta   | (Ealb:0.02311254,Ecry:0.007912509,(Mped:0.1132083,(Mant:0.1007896):0.0255964,MgeI:0.08999871):0.05545259,(Msol:0.07418853):0.04720779,Mhyd:0.08393262);    |
| EF1a    | (Ealb:0.06155822,Ecry:0.05248541,(Mped:0.05515498,(Msol:0.05667427,Mhyd:0.06419409):0.02041683,(Mant:0.03704231):0.01661503,MgeI:0.03527733):0.03079627    |
| GAPDH   | (Ealb:0.02965163,Ecry:0.01018119,(Mped:0.1023636,(Msol:0.1110167,Mhyd:0.07963731):0.02086502,(Mant:0.08317348,MgeI:0.08051307):0.3720227);                 |
| His3    | (Ealb:0.4618253,Ecry:0.1657169,(Mped:0.09145983,(Msol:0.2043889):0.06660217,(Mant:0.05458691,MgeI:0.1081008,Mhyd:0.08565743):0.07861968);                  |
| Nad1    | (Ealb:0.06557506,Ecry:0.1439481,(Mped:0.3475321,(Msol:0.2614244,Mhyd:0.2768651):0.06552739,MgeI:0.2453313):0.05999569,(Mant:0.1464659):1.106616);          |
| Nad2    | (Ealb:0.1166942,Ecry:0.09196712,(Mped:0.3152666,(Msol:0.4380866,Mhyd:0.269151):0.1388592,(Mant:0.2681369,MgeI:0.2627457):0.07513771):2.38637);             |
| Nad3    | (Ealb:0.08377358,Ecry:0.09204989,(Mped:0.2560777,(Msol:0.2309416,(Mant:0.1874927,MgeI:0.1822523,Mhyd:0.2224673):0.8099003);                                |
| Nad4    | (Ealb:0.1254377,Ecry:0.06112254,(Mped:0.186308,(Msol:0.2832701,Mhyd:0.2412424):0.1010536,(Mant:0.2694843,MgeI:0.2732755):1.464979);                        |
| Nad4L   | (Ealb:0.09111356,Ecry:0.06359623,(Mped:0.2287165,(Msol:0.3784204,(Mant:0.169601,Mhyd:0.2387357):0.1138872,MgeI:0.09100801):1.544231);                      |
| Nad5    | (Ealb:0.06632153,Ecry:0.1155907,(Mped:0.2878917,MgeI:0.1724932):0.07616429,(Mant:0.2707214):0.06106031,(Msol:0.3768889,Mhyd:0.1754368):0.08591947):1.147   |
| Nad6    | (Ealb:0.09655636,Ecry:0.1306967,(Mped:0.5228473,(Msol:0.3751322,(Mant:0.2812365,MgeI:0.3089747,Mhyd:0.3991824):3.104096);                                  |
| OSCP    | (Ealb:0.007914523,Ecry:0.01891683,(Mped:0.11301,(Mant:0.07559698,MgeI:0.06912302):0.02215433):0.05354757,Mhyd:0.06046808):0.05404024,(Msol:0.1235045):0.   |
| b       | (Ealb:0.03214107,Ecry:0.0252717,(Mped:0.1431415,(Mant:0.05179623,MgeI:0.0955153):0.01966341):0.03779533,(Msol:0.1404522,Mhyd:0.09338837):0.05312848):0.9   |
| c       | (Ealb:0.01380941,Ecry:0.02547177,(Mped:0.03104475,(Msol:0.07769612,Mhyd:0.08155793):0.04698265,(Mant:0.0831281,MgeI:0.09443937):0.06045514):0.6834484);    |
| d       | (Ealb:0.01097478,Ecry:0.027533,(Mped:0.09748302,MgeI:0.0635017):0.02492598,(Mant:0.07978162):0.05921604,Mhyd:0.08366598):0.07140724,(Msol:0.05010475):0.   |
| Gamma   | (Ecry:0.5470455,Mped:0.06583683,(Msol:0.1688175,Mhyd:0.1053316):0.02367685,MgeI:0.06574272):0.02567122,(Mant:0.07674278):0.03466705);                      |
| Epsilon | (Ecry:0.4470465,Mped:0.05858022,(Msol:0.1491025,(Mant:0.1020348):0.05211):0.04423441,(MgeI:0.04290376,Mhyd:0.09981654):0.04159724);                        |



**Table S8.**

## White snow worm morphological comparison

| Traits                    | Sample 1 (small)                                                                 | Sample 2 (medium)                                                                | <i>Mesenchytraeus hydrius</i>                                                    | Compare                     |
|---------------------------|----------------------------------------------------------------------------------|----------------------------------------------------------------------------------|----------------------------------------------------------------------------------|-----------------------------|
| <b>Shape of Body</b>      | cylindrical, elongate, smooth and approximately of the same diameter             | cylindrical, elongate, smooth and approximately of the same diameter             | Cylindrical, elongate, smooth and approximately of the same diameter throughout. | same                        |
| <b>Color</b>              | whitish                                                                          | whitish                                                                          | whitish                                                                          | same                        |
| <b>Body length</b>        | 10 mm                                                                            | 16 mm                                                                            | 17-24 mm                                                                         | Less than <i>M. hydrius</i> |
| <b>Body Width</b>         | 0.87 mm                                                                          | 0.94 mm                                                                          | 0.76-0.91 mm                                                                     | Less than <i>M. hydrius</i> |
| <b>Number of segments</b> | 70                                                                               | 87                                                                               | 82-97                                                                            | Less than <i>M. hydrius</i> |
| <b>Head pore</b>          | The small, smooth, rounded prostomium carries the head pore near its tip.        | The small, smooth, rounded prostomium carries the head pore near its tip.        | The small, smooth, rounded prostomium carries the head pore near its tip.        | same                        |
| <b>Chaetae and number</b> | 2-5 lateral<br>2-6 ventral                                                       | 2-5 lateral<br>2-6 ventral                                                       | 4-7 lateral<br>5-9 ventral                                                       | Less than <i>M. hydrius</i> |
| <b>Clitellum position</b> | 12-13 annulus                                                                    | 12-13 annulus                                                                    | <sup>1/3</sup> 11-13 annulus                                                     | same                        |
| <b>Clitellar glands</b>   | Present in XII                                                                   | Present in XII                                                                   | presence                                                                         | same                        |
| <b>Spermatheca</b>        | attached to between of IV-V annulus,<br>2 pairs of diverticula, extending to XI. | attached to between of IV-V annulus,<br>2 pairs of diverticula, extending to XI. | attached to between of IV-V annulus,<br>2 pairs of diverticula, extending to XI. | same                        |
| <b>Genital pore</b>       | Male gonopore in between XI-XII,<br>Female gonopore in between XII-XIII,         | Male gonopore in between XI-XII,<br>Female gonopore in between XII-XIII,         | ?                                                                                | ?                           |
| <b>Testis</b>             | Present                                                                          | Present                                                                          | ?                                                                                | ?                           |
| <b>Sperm funnel</b>       | approximately cylindrical                                                        | approximately cylindrical                                                        | approximately cylindrical                                                        | same                        |
| <b>Atrial gland</b>       | Present: 5                                                                       | Present: 5                                                                       | about 5 atrial glands                                                            | same                        |
| <b>accessory gland</b>    | no accessory glands                                                              | no accessory glands                                                              | no accessory glands                                                              | same                        |
| <b>sperm sac</b>          | no sperm sacs                                                                    | no sperm sacs                                                                    | no sperm sacs                                                                    | same                        |
| <b>Vas deferens</b>       | present                                                                          | present                                                                          | present                                                                          | same                        |
| <b>Ovary</b>              | ?                                                                                | ?                                                                                | 1 ovisac extending to 31-33                                                      | ?                           |

**Figure S1.** *Mesenchytraeus antaeus* SEM images

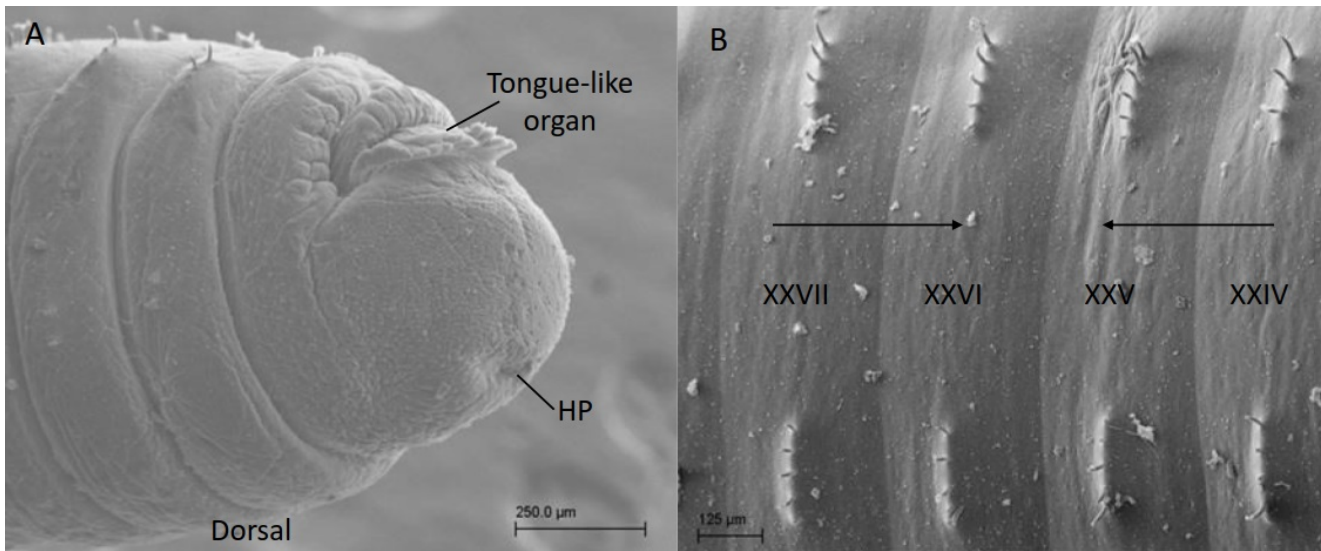

**Figure S2.** *Mesenchytraeus hydrius* morphology

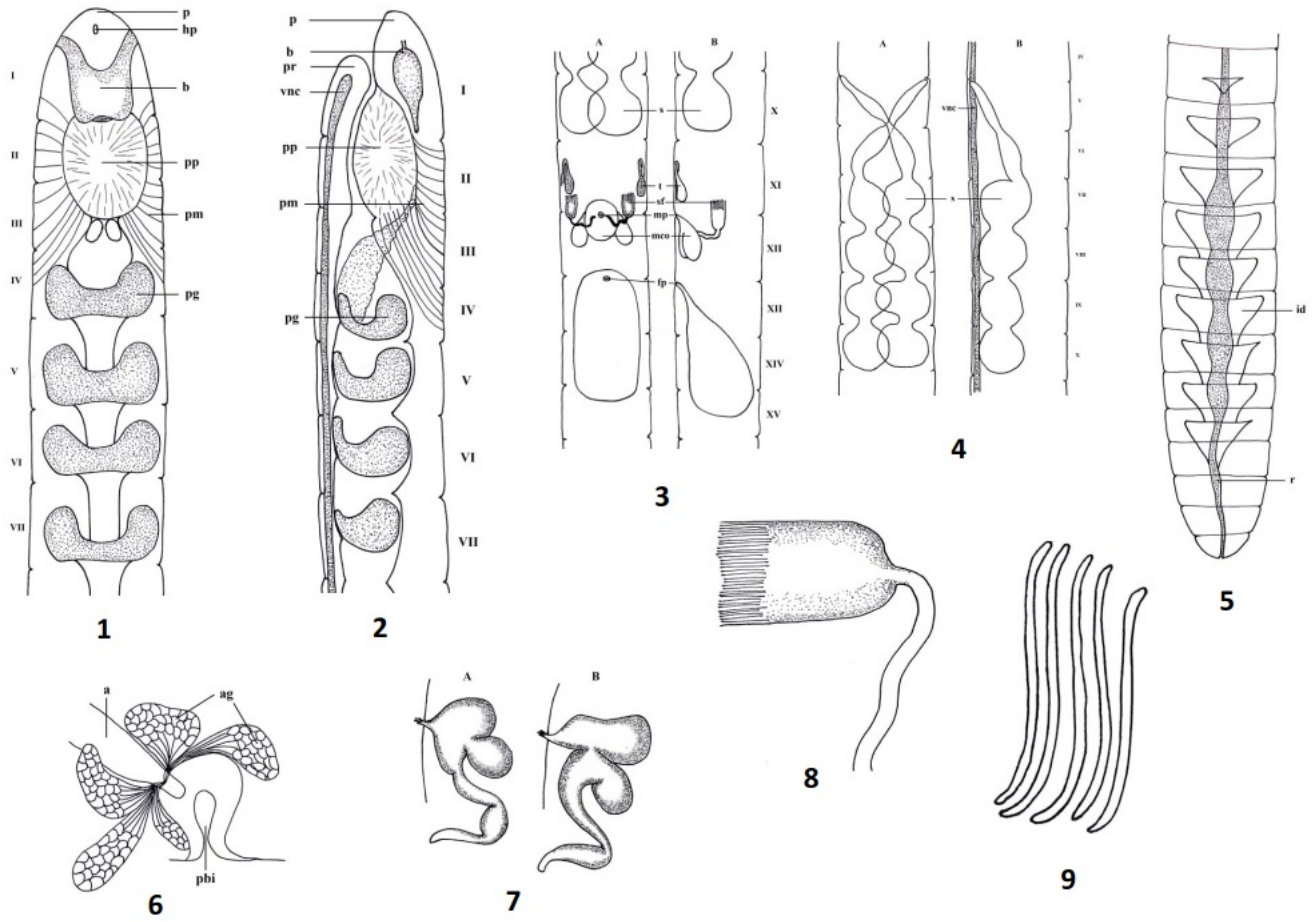

## Supplementary Materials and Methods

### *Specimens*

Enchytraeidae, most of which are <15 mm long and transparent or white, are primarily identified by internal structures using live specimens examined with a light microscope (Schmelz and Collado, 2010). However, this technique is often not practical for *Mesenchytraeus* species due to their size and/or pigmentation. Thus, morphological identifications were performed on freshly sacrificed specimens prepared as follows. Worms were placed in 70% ethanol for 24 hours, then dehydrated through an ethanol series: 80% (10 min), 90% (10min), 100% (2 x 10 min). Dehydrated specimens were transferred to a 1:2 ratio of benzyl alcohol:benzyl benzoate (Sigma-Aldrich) and incubated until transparent (~20 min). Internal structures were sketched and photographed for comparison to published descriptions. In addition, external morphology was imaged with a LEO 1450EP scanning electron microscope as described in Shain et.al (2000).

### *Species identification*

With the exception of *M. hydrius*, the *Mesenchytraeus* species chosen for this investigation were those that have been reliably observed/collected/identified in specific locations by ourselves and colleagues within the past ~25 years. *Mesenchytraeus solifugus* is recognized as the only species of glacier ice worm in the PNW and considerable molecular data (e.g., Hartzell et al., 2005; Dial et al., 2012) has confirmed this. The aquatic species, *M. pedatus*, was collected from the Sacramento River at Redding, CA, identified as site 18 by Healy and Fend (2002), who found *only M. pedatus* at that location. The external features (color, size, setae arrangement, head pore location, penial papillae) were consistent with Healy and Fend's (2002) expanded description, but internal morphology was not examined and molecular population data showed wide variation. Thus, sequence data for this species is designated *Mesenchytraeus cf. pedatus*. Likewise, multiple *M. antaeus* worms were collected from well-rotted logs at the same location described in Rota and Brinkhurst (2000), and external features, in particular their extraordinary length (30-60 mm) and lack of pigmentation, are in complete agreement with those authors' detailed description. Due to their size, attempts to view internal structures were unsuccessful, however, SEM images captured the everted tongue-like structure and anterior-posterior setae orientation switch described by the authors (Fig. S2A, B) and we are confident that our terrestrial species is *M. antaeus*.

The worms identified here as *M. gelidus* were collected from the Mt. Rainier region as were those originally described by Welch (1916). Size and pigmentation prevented viewing of internal structures, but external morphology was consistent with Welch's description, with the exception of fewer antero-ventral setae (5-7 vs. 7-9). GenBank has two entries for 28S rRNA sequence for *M. gelidus* that differed from ours by 1%, an unaccountably large difference if these are the same species. However, those specimens were collected from Yosemite, CA and it is unclear that a definitive identification was performed. Due to these discrepancies, and the fact that Welch's comparative analyses were primarily based on internal structures, the sequence data for this species has been designated *Mesenchytraeus cf. gelidus*.

The final *Mesenchytraeus* species considered here, *M. hydrius*, was discovered while collecting worms from the transient snow fields in the Mt. Rainier area. We were able to perform in-depth examinations of these worms and are confident they are *M. hydrius* (see Table S8, Fig. S2 for details).

The outgroup species, *Enchytraeus albidus*, collected in Denmark, was verified by B. Christensen (Fisker 2014). In view of the known problems with identification of *E. crypticus*/*E. variatus*, the molecular data generated for this species was designated *Enchytraeus cf. crypticus*.

### *Polymerase Chain Reaction*

Reactions contained 34.5 µl water, 200 µM dNTPs, 600 nM primers, 10 µl of 5X Phusion HF buffer, 1 U Phusion Hot Start II DNA Polymerase (Thermo Scientific), and 50-200 ng total genomic DNA. Reaction conditions were: denaturation at 98°C for 30 seconds, followed by 35 cycles of 98°C for 10 s, 47-60°C for 20 s, and 72°C for 0.5-2 min; final extensions were 5 min at 72°C. Single-band PCR products were purified using DNA Clean and Concentrator (Zymo Research); multi-band products were electrophoresed on 0.8% agarose gels and desired bands excised. Gel-excised DNA was purified using a Zymoclean Gel DNA Recovery Kit (Zymo Research) according to the manufacturer's protocol. Fragments were cloned into pMiniT vectors (New England Biolabs), transformed into NEB 10-beta chemically-competent *E. coli*, and 3-5 clones/fragment/species were selected for purification using Zippy Plasmid Miniprep (Zymo Research). Sanger DNA sequencing was performed by GENEWIZ, Inc. (South Plainfield, NJ). Initial sequencing was performed using vector-specific forward and reverse primers. Resequencing was performed as necessary using original and internal primers, to ensure recovery of overlapping sequences. For regions spanning multiple consecutive tRNAs, KAPA2G Robust polymerase (KAPA Biosystems) was used according to the manufacturer's protocol.

### *Transcriptome generation*

Transcriptomes were generated at different facilities, thus preparation details varied and are described separately. For *M. solifugus*, *M. pedatus* and *E. crypticus*, 10-12 worms/species were pooled and total RNA was extracted using TRIzol (Invitrogen) according to the manufacturer's protocol. The SMART cDNA library construction kit (Clontech) was used for first-strand cDNA synthesis, followed by synthesis and amplification of double-stranded cDNA using the Advantage 2 PCR Kit (Clontech). Illumina sequencing was conducted at the Genomics Services Laboratory at Hudson Alpha Institute for Biotechnology (Huntsville, AL). For *M. pedatus* and *M. solifugus*, sequencing runs were performed on an Illumina HiSeq 2000 platform with 2 x 100 bp paired-end reads using the TruSeq v3 (Illumina) protocol. *Enchytraeus crypticus* sequencing employed the Illumina HiSeq 2500 platform with 2 x 150 bp paired-end reads, also using the TruSeq v3 (Illumina) protocol. Paired-end reads were demultiplexed and *de novo* assembly was performed using the Trinity software package (Grabherr et al., 2011), version October 2012 (*M. pedatus*, *M. solifugus*) or February 2013 (*E. crypticus*) with default settings. See Waits et al. (2016) for additional details.

For *M. antaeus*, *M. gelidus*, and *M. hydrius*, total RNA was extracted from single worms using TRIzol Plus RNA Purification Kit (Invitrogen) according to the manufacturer's protocol. RNA samples were express-shipped to the Giribet lab at Harvard University's Department of Organismic and Evolutionary Biology and purified using the Dynabeads mRNA Purification Kit (Invitrogen) following manufacturer's instructions. cDNA libraries were constructed in the Apollo 324 automated system using the PrepX mRNA kit (IntegenX). Further details about the protocols can be found in Fernández et al. (2014). Samples were run using the Illumina HiSeq 2500 platform with

2 x 150 paired-end reads at the FAS Center for Systems Biology at Harvard University. Demultiplexed sequencing results, in FASTQ format, were retrieved, each sample being quality-filtered according to a threshold average quality score of 30 based on a Phred scale and adaptor trimmed using Trim Galore! 0.3.3 (Wu et al., 2011). Ribosomal RNA and mitochondrial DNA were filtered out using Bowtie v. 1.0.0 (Langmead et al., 2009). Strand specific de novo assemblies were done individually in Trinity (Haas et al., 2013) using paired read files, a strand specificity flag and path reinforcement distance enforced to 75. Access to the *E. albidus* transcriptome was provided by Christer Erséus (U. of Gothenburg, Sweden).

#### *Gene extraction and verification from transcriptomes*

Multiple loci with varying levels of conservancy were chosen for phylogenetic analyses in an effort to effectively infer the most plausible species tree. Well-conserved nuclear housekeeping genes, *actin*, *α-tubulin*, *EF-1α*, *histone H3*, and *GAPDH* were extracted, as well as core subunits of ATP synthase: *alpha*, *beta*, *gamma*, *delta*, *epsilon*, *b*, *c*, *d* and *OSCP*. The latter genes, though nuclear-encoded, function within the mitochondria in conjunction with mitochondrial-encoded genes to produce the bulk of cellular energy. The critical importance of this metabolic process imposes mito-nuclear coevolutionary constraints that are linked to speciation (Schmidt et al., 2001; Gershoni et al., 2009; Bar-Yaacov et al., 2012; Hill, 2016), thus making them good candidates for species delimitation analysis. In addition, all 13 mitochondrial PCGs and 12S and 16S ribosomal RNAs were extracted for comparison to PCR-amplified sequences (see Table S2 for gene details). Local BLAST searches were performed using NCBI's BLAST 2.2.26 utilizing the aforementioned Trinity assemblies as databases. Queries for nuclear-encoded genes used annelid gene sequence when available, but otherwise queries were made using mollusc, lancelet, and acorn worm sequence. Extracted transcripts were subjected to GenBank searches to verify gene identity, translated to ensure that they were not pseudogenes, and aligned to each other to assess relatedness. Extracts with questionable or incomplete sequence were re-BLAST using genus-specific queries and/or subjected to raw-read mapping to rule out assembly error.

#### *Mitochondrial sequence alignment and annotation*

DNA sequence chromatograms were evaluated and trimmed using Chromas 2.4.3 (Technelysium). Overlapping sequence fragments were aligned in MEGA version 6 (Tamura et al., 2013) and assembled into consensus sequence contigs using Mesquite v.3.04 (Maddison and Maddison, 2015). Protein coding genes (PCGs) and ribosomal RNAs were identified using NCBI's BLASTx and BLASTn algorithms. Individual genome contigs were uploaded to DOGMA (<http://dogma.cccb.utexas.edu>) for identification of tRNAs and whole genome annotation using default parameters for invertebrate mitochondrial genomes (tRNA data is discussed in a separate manuscript).

#### *Phylogenetic analyses*

Estimation of divergence time was performed in BEAST v1.8.2 (Drummond et al., 2012) and in MrBayes v3.2.6 (Ronquist et al., 2011) using a dataset comprising *cox1*, *cytb*, *nad4*, *actin*, *EF-1α*, *histone H3* and 28s rRNA (Table S3). For these analyses, a minimum age bound for family Enchytraidae was 35 million years before

present based on a fossilized specimen found in Baltic amber (Ulrich and Schmelz, 2001). *Lumbricus terrestris* was used as the outgroup with sequences retrieved from GenBank (*cox1*, *cytb*, *nad4*: U24570.1; 28S:HQ691218.1; *actin*:X96514.1; *EF-1 $\alpha$* :DQ813372.1; *histone H3*:FJ214241.1). For the BEAST analysis, the XML file specified application of the GTR substitution model, 4 gamma categories, proportion invariant (0-1), and an uncorrelated relaxed clock (Drummond et al., 2006) with lognormal distribution. For 'time to most recent common ancestor' (tmrca), a uniform age constraint prior on the root of 35/300 or 44/500 (mya) was applied. The lower bounds represent the youngest (35) and mean (44) estimated ages of Baltic amber (Larsson, 1978; Standke, 1998), while the upper bounds represent the estimated ages of oligochaetes (300) and annelids (500) (Bomfleur et al., 2012; Parry et al., 2014). Each age constraint file had 5 independent runs of 100 million generations, sampling every 10,000, executed via the CIPRES-Portal v.3.3 (Miller et al., 2010). Convergence, ESS, 95% HPD, and ucl.d.stdev were assessed in Tracer v1.6 (Rambaut et al., 2014).

MrBayes analysis employed the independent gamma rates (IGR) relaxed clock model with a GTR + gamma substitution model and variable rates across partitions (determined with PartitionFinder v1.1.0; Lanfear et al., 2012). A uniform root constraint (35/300 mya) was set for calibration, and a partial backbone constraint was specified to separate *Mesenchytraeus* from *Enchytraeus*. Four independent runs of 5 million generations were performed and convergence was assessed as described previously.

## Supplementary References

Bar-Yaacov, D., Blumberg, A., Mishmar, D. (2012) Mitochondrial-nuclear co-evolution and its effects on OXPHOS activity and regulation. *Biochim Biophys Acta* 1819: 1107-1111.

Bomfleur, B., Kerp, H., Taylor, T., Moestrup, O., Taylor, E. (2012) Triassic leech cocoon from Antarctica contains fossil bell animal. *PNAS* 109: 20971–20974.

Borda, E. and Siddall, M.E. (2004) Arhynchobdellida (Annelida: Oligochaeta: Hirudinida): phylogenetic relationships and evolution. *Mol Phylogenet Evol* 30: 213-25.

Drummond, A.J., Ho, S.Y.W., Phillips, M.J., Rambaut, A. (2006) Relaxed phylogenetics and dating with confidence. *PLoS Biology* 4: e88.

Drummond, A.J., Suchard, M.A., Xie, D., Rambaut, A. (2012) Bayesian phylogenetics with BEAUti and the BEAST 1.7 *Mol Biol Evol* 29: 1969-1973.

Fernández, R., Laumer, C.E., Vahtera, V., Libro, S., Kaluziak, S., Sharma, P.P., Pérez-Porro, A.R., Edgecombe, G.D., Giribet, G. (2014) Evaluating topological conflict in centipede phylogeny using transcriptomic data sets. *Mol Biol Evol* 31: 1500–1513. doi:10.1093/molbev/msu108.

Fisker KV. 2014 Physiological and biochemical adaptations to low temperature and copper stress in terrestrial annelids. PhD thesis, Aarhus University, Department of Bioscience, Denmark.

Folmer, O., Black, M., Hoeh, W., Lutz, R., Vrijenhoek, R. (1994) DNA primers for amplification of mitochondrial cytochrome c oxidase subunit I from diverse metazoan invertebrates. *Mol Mar Biol Biotechnol* 3: 294–299.

Gershoni, M., Templeton, A.R., Mishmar, D. (2009) Mitochondrial bioenergetics as a major motive force of speciation. *Bioessays* 31: 642-650.

- Grabherr, M.G., Haas, B.J., Yassour, M., Levin, J.Z., Thompson, D.A., Amit, I., Adiconis, X., Fan, L., Raychowdhury, R., Zeng, Q., Chen, Z., Mauceli, E., Hacohen, N., Gnirke, A., Rhind, N., di Palma, F., Birren, B.W., Nusbaum, C., Lindblad-Toh, K., Friedman, N., Regev, A. (2011) Full-length transcriptome assembly from RNA-seq data without a reference genome. *Nat Biotechnol.* 29(7): 644-52. doi: 10.1038/nbt.1883.
- Hartzell, P.L., Nghiem, J.V., Richio, K.J., Shain, D.H. (2005) Distribution and phylogeny of glacier ice worms (*Mesenchytraeus solifugus* and *Mesenchytraeus solifugus rainierensis*). *Can J Zool* 83(9):1206-1213, 10.1139/z05-116.
- Haas, B.J., Papanicolaou, A., Yassour, M., Grabherr, M., Blood, P.D., Bowden, J., Couger, M.B., Eccles, D., Li, B., Lieber, M., Macmanes, M.D., Ott, M., Orvis, J., Pochet, N., Strozzi, F., Weeks, N., Westerman, R., William, T., Dewey, C.N., Henschel, R., Leduc, R.D., Friedman, N., Regev, A. (2013) De novo transcript sequence reconstruction from RNA-seq using the Trinity platform for reference generation and analysis. *Nat Protoc.* Aug;8(8): 1494-512. doi: 10.1038/nprot.2013.084.
- Hill, G.E. (2016) Mitonuclear coevolution as the genesis of speciation and the mitochondrial DNA barcode gap. *Ecol Evol* 6:5831–5842. doi: 10.1002/ece3.2338.
- Lanfear, R., Calcott, B., Ho, S., Guindon, S. (2012) PartitionFinder: combined selection of partitioning schemes and substitution models for phylogenetic analyses. *Mol Biol Evol* 29: 1695–1701.
- Langmead, B., Trapnell, C., Pop, M., Salzberg, S.L. (2009) Ultrafast and memory-efficient alignment of short DNA sequences to the human genome. *Genome Biol* 10. doi:10.1186/Gb-2009-10-3-R25.
- Larsson, S.G. (1978) Baltic Amber - A palaeontological study. Entomograph, Vol. I. Scandinavian Scientific Press, Klampenborg.
- Maddison, W.P. and Maddison, D.R. (2015) Mesquite: a modular system for evolutionary analysis, Version 3.04. <http://mesquiteproject.org>.
- Miller, M.A., Pfeiffer, W., Schwartz, T. (2010) "Creating the CIPRES Science Gateway for inference of large phylogenetic trees" in Proceedings of the Gateway Computing Environments Workshop (GCE), 14 Nov. 2010, New Orleans, LA pp 1-8.
- Parry, L., Tanner, A., Vinther, J. (2014) The origin of annelids. *Palaeontology* 57: 1091-1103.
- Rambaut, A., Suchard, M.A., Xie, D., Drummond, A.J. (2014) Tracer v1.6, Available from <http://beast.bio.ed.ac.uk/Tracer>.
- Ronquist, F., Teslenko, M., van der Mark, P., Ayres, D.L., Darling, A., Höhna, S., Larget, B., Liu, L., Suchard, M.A., Huelsenbeck, J.P. (2012) MrBayes 3.2: efficient Bayesian phylogenetic inference and model choice across a large model space. *Syst Biol* 61(3):539-42. doi: 10.1093/sysbio/sys029.
- Schmelz, R.M., and Collado, R. (2010) A guide to European terrestrial and freshwater species of Enchytraeidae (Oligochaeta). *Soil Organisms*, 82: 1-176.
- Schmidt, T.R., Wu, W., Goodman, M., Grossman, L.I. (2001) Evolution of nuclear- and mitochondrial-encoded subunit interaction in cytochrome c oxidase. *Mol Biol Evol* 18(4):563-569.



Shain, D.H., Mason, T.A., Farrell, A.H., Michalewicz, L.A. (2001) Distribution and behavior of ice worms (*Mesenchytraeus solifugus*) in south-central Alaska. *Canadian Journal of Zoology* 79(10): 1813-1821, 10.1139/z01-143.

Standke, G. (1978) Die Tertiärprofile der Samlandischen Bernsteinküste bei Rauschen. *Schriftenreihe Geowiss* 7: 93-103.

Tamura, K; Stecher, G., Peterson, D., Filipowski, A., Kumar, S. (2013) MEGA6: Molecular Evolutionary Genetics Analysis version 6.0. *Mol Biol Evol* 30: 2725-2729.

Ulrich, H. and Schmelz, R.M. (2001) Enchytraeidae as prey of Dolichopodidae, recent and in Baltic amber. *Bonn Zool Beitr* 50: 89-101.

Waits, D.S., Santos, S.R., Thornhill, D.J., Li, Y., Halanych, K.M. (2016) Evolution of sulfur binding by hemoglobin in Siboglinidae (Annelida) with special reference to bone-eating worms, *Osedax*. *J Mol Evol* 82: 219-229. DOI 10.1007/s00239-016-9739-7.

Wu, Z., Wang, X., Zhang, X. (2011) Using non-uniform read distribution models to improve isoform expression inference in RNA-Seq. *Bioinformatics* 27(4):502-8. doi: 10.1093/bioinformatics/btq696.
